# Supplementary material for: Walking capacity and its association with quality of life among children with down syndrome in Saudi Arabia
Source: Springer Nature journal article supplement (doi:10.1186/s12887-023-04519-8), 2024-01-19

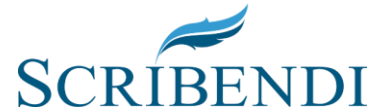

## Certificate of Editing and Proofreading

This certifies that a version of the document titled

**Walking capacity and its association with quality of life among children with Down syndrome in Saudi Arabia**

authored by

**Saad Aziz**

was edited and/or proofread by Scribendi as order number

**975840**

for clarity, consistency, and correctness according to the requirements and guidelines specified by the client.

**Mon, 06 Nov 2023**

*Scribendi Inc*

SCRIBENDI INC.  
405 RIVERVIEW DRIVE  
CHATHAM, ON N7M 0N3 CANADA  
+1 (519) 351 1626

[www.scribendi.com](http://www.scribendi.com)

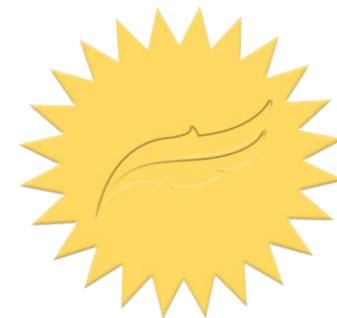

Supplement: MOESM1 [file 26643408]
